# Supplementary material for: Inflammation scores based on C-reactive protein and albumin predict mortality in hospitalized older patients independent of the admission diagnosis
Source: PubMed Central journal article supplement (PMC11463076; doi:10.1186/s12979-024-00471-y), 2024-10-09
Supplement: 12979_2024_471_MOESM1_ESM.pdf [file 12979_2024_471_MOESM1_ESM.pdf]

# Inflammation scores based on C-reactive protein and albumin predict mortality in hospitalized older patients independent of the admission diagnosis

## SUPPLEMENTARY MATERIAL

**Figure S1.** Kaplan-Meier survival estimates for (A) Females and (B) Males.

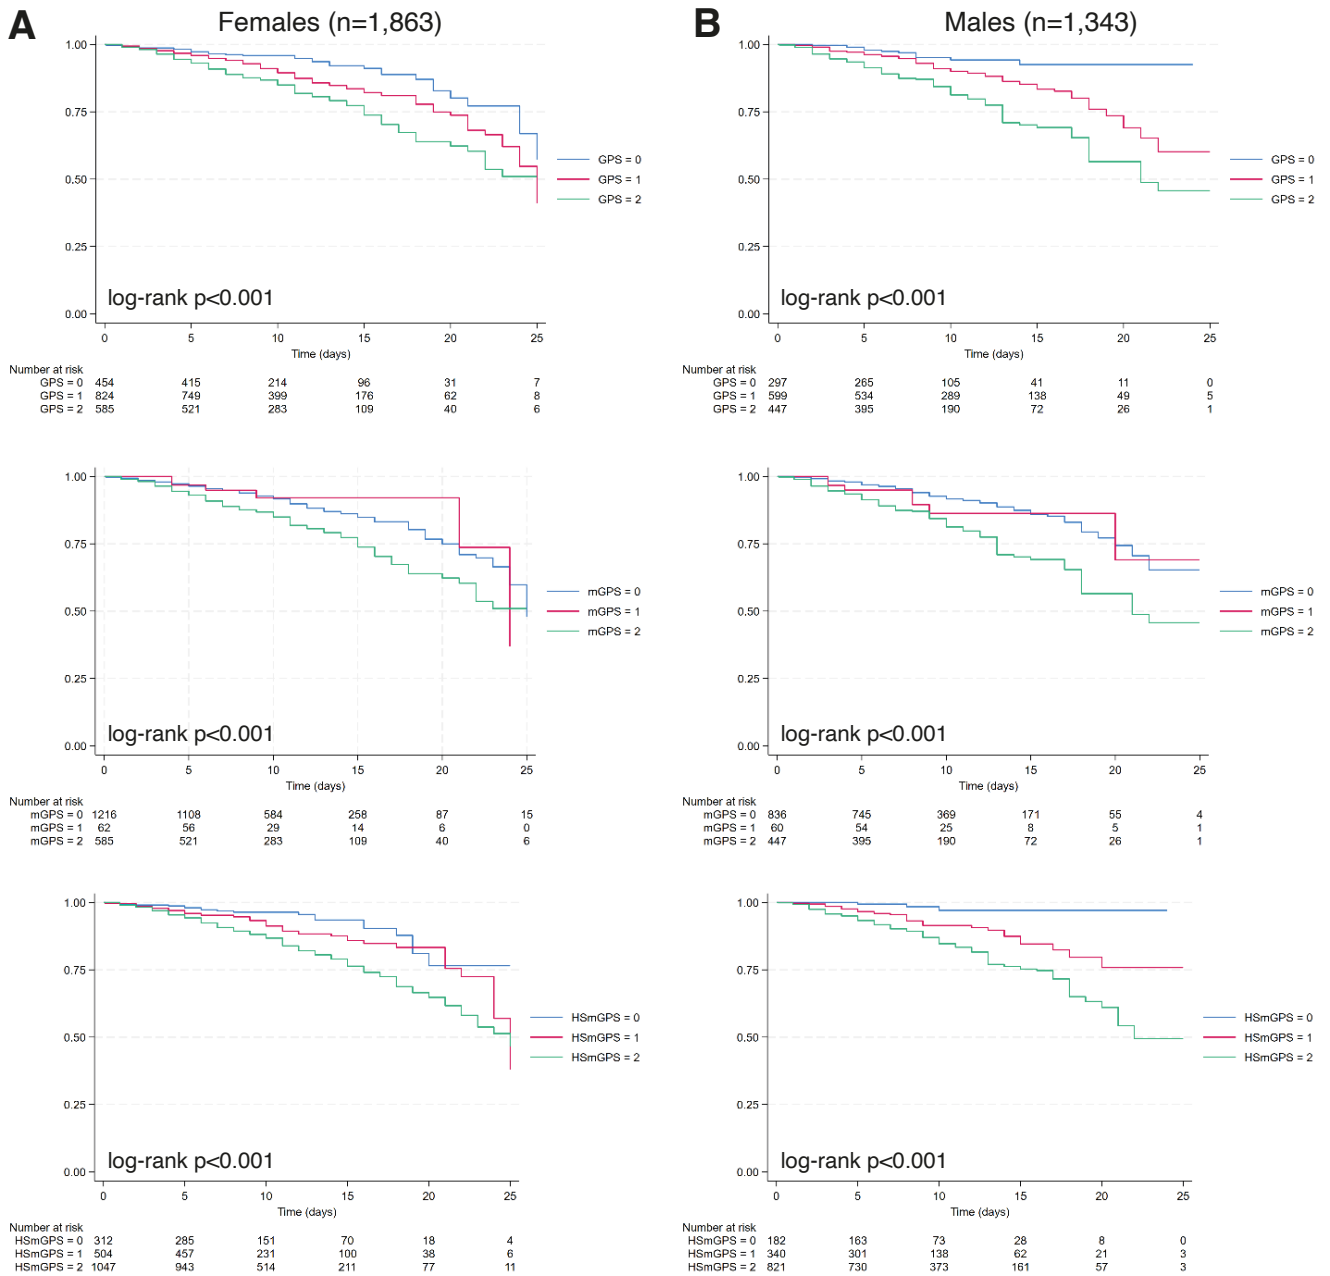

**Table S1.** Hazard ratios for all predictors included in the fully adjusted Cox proportional hazards model.

| <b>Model 3</b>                  |                               |
|---------------------------------|-------------------------------|
|                                 | <b>HR (95%CI)</b>             |
| <b>CAR</b>                      | <b>1.94 (1.56-2.41)</b>       |
| <b>Age</b>                      | <b>1.02 (1.00-1.04)</b>       |
| <b>Female gender, ref. Male</b> | 0.88 (0.72-1.06)              |
| <b>5+ Drugs, ref. 0-4</b>       | <b>0.69 (0.56-0.85)</b>       |
| <b>3+ lost ADL, ref. 0-2</b>    | <b>6.03 (3.79-9.58)</b>       |
| <b>3+ lost IADL, ref. 0-2</b>   | 0.95 (0.73-1.23)              |
| <b>eGFR (BIS1)</b>              | <b>0.99 (0.98-0.99)</b>       |
| <b>NLR</b>                      | <b>1.02 (1.01-1.02)</b>       |
| <b>ALT</b>                      | <b>1.0007 (1.0003-1.0010)</b> |
| <b>Hgb</b>                      | 1.02 (0.97-1.07)              |
| <b>Platelets</b>                | 0.99 (0.99-1.00)              |
| <b>AMI</b>                      | 1.31 (0.99-1.74)              |
| <b>Cirrhosis</b>                | 0.76 (0.28-2.04)              |
| <b>CHF</b>                      | <b>1.90 (1.44-2.50)</b>       |
| <b>Cerebrovascular diseases</b> | 0.98 (0.76-1.27)              |
| <b>Dementia</b>                 | <b>0.77 (0.63-0.95)</b>       |
| <b>COPD</b>                     | 0.90 (0.69-1.16)              |
| <b>Parkinson</b>                | 1.06 (0.69-1.61)              |
| <b>Hypertension</b>             | 0.85 (0.70-1.04)              |
| <b>CKD</b>                      | <b>0.70 (0.56-0.89)</b>       |
| <b>Diabetes</b>                 | 0.99 (0.76-1.30)              |
| <b>Sepsis</b>                   | <b>1.36 (1.10-1.69)</b>       |
| <b>Cancer</b>                   | <b>1.67 (1.25-2.22)</b>       |

In bold significant associations.

**Table S2.** Sex-specific Cox proportional hazards models.

|                | <b>Females (n=1,863)</b> |                         |                         | <b>Males (n=1,343)</b>   |                         |                         |
|----------------|--------------------------|-------------------------|-------------------------|--------------------------|-------------------------|-------------------------|
|                | <b>Model1</b>            | <b>Model2</b>           | <b>Model3</b>           | <b>Model1</b>            | <b>Model2</b>           | <b>Model3</b>           |
|                | <b>HR (95%CI)</b>        | <b>HR (95%CI)</b>       | <b>HR (95%CI)</b>       | <b>HR (95%CI)</b>        | <b>HR (95%CI)</b>       | <b>HR (95%CI)</b>       |
| <b>CAR</b>     | <b>2.45 (1.91-3.14)</b>  | <b>2.39 (1.85-3.08)</b> | <b>1.48 (1.10-2.01)</b> | <b>3.81 (2.82-5.16)</b>  | <b>3.73 (2.77-5.03)</b> | <b>2.68 (1.92-3.74)</b> |
| <b>GPS</b>     |                          |                         |                         |                          |                         |                         |
| <b>1</b>       | <b>1.79 (1.22-2.63)</b>  | <b>1.73 (1.18-2.54)</b> | 1.38 (0.93-2.06)        | <b>2.37 (1.31-4.27)</b>  | <b>2.17 (1.20-3.92)</b> | 1.43 (0.77-2.63)        |
| <b>2</b>       | <b>2.68 (1.83-3.93)</b>  | <b>2.47 (1.68-3.64)</b> | <b>1.56 (1.02-2.39)</b> | <b>4.57 (2.56-8.15)</b>  | <b>4.22 (2.36-7.54)</b> | <b>2.56 (1.39-4.73)</b> |
| <b>mGPS</b>    |                          |                         |                         |                          |                         |                         |
| <b>1</b>       | 0.80 (0.35-1.81)         | 0.89 (0.39-2.02)        | 1.18 (0.52-2.71)        | 1.23 (0.57-2.66)         | 1.23 (0.57-2.66)        | 1.30 (0.57-2.97)        |
| <b>2</b>       | <b>1.75 (1.37-2.24)</b>  | <b>1.66 (1.30-2.13)</b> | 1.21 (0.92-1.60)        | <b>2.35 (1.75-3.14)</b>  | <b>2.30 (1.72-3.08)</b> | <b>1.92 (1.41-2.61)</b> |
| <b>hs-mGPS</b> |                          |                         |                         |                          |                         |                         |
| <b>1</b>       | <b>1.79 (1.06-3.02)</b>  | <b>1.76 (1.04-2.97)</b> | 1.54 (0.91-2.63)        | <b>5.26(1.61-17.19)</b>  | <b>5.11(1.56-16.71)</b> | <b>3.62(1.09-12.00)</b> |
| <b>2</b>       | <b>2.96 (1.85-4.75)</b>  | <b>2.77 (1.72-4.44)</b> | <b>1.78 (1.09-2.93)</b> | <b>10.31(3.29-32.31)</b> | <b>9.55(3.04-29.98)</b> | <b>5.32(1.66-17.02)</b> |

In bold significant associations.

Model 1: unadjusted

Model 2: adjusted for age

Model 3: adjusted for age, 5+ Drugs, 3+ lost ADL, 3+ lost IADL, eGFR, NLR, ALT, Hgb, Platelet, AMI, liver cirrhosis, CHF, CeVD, dementia, COPD, Parkinson, hypertension, CKD, diabetes, sepsis, cancer
